# Supplementary material for: Br-doped Ga2O3/MCM-41 catalyzed synthesis of propylene carbonate from carbon dioxide and propylene oxide
Source: Royal Society of Chemistry journal article supplement (doi:10.1039/d4nj00369a), 2024-01-01
Supplement: d4nj00369a1.pdf [file d4nj00369a1.pdf]

## Supporting Information

### Br-doped Ga<sub>2</sub>O<sub>3</sub>/MCM-41 catalyzed synthesis of propylene carbonate from carbon dioxide and propylene oxide

Chenxia Xu<sup>a</sup>, Jianhua Lv<sup>a\*</sup>, Jidong Liu<sup>a</sup>, Bao Guo<sup>a</sup>, Wensong Li<sup>a</sup>

<sup>a</sup> School of Chemical Engineering and Technology, Hebei University of Technology, Tianjin 300130, China

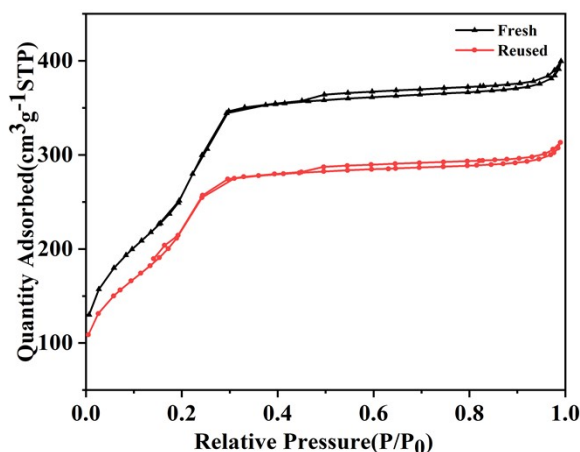

**Fig. S1** N<sub>2</sub> adsorption-desorption isotherms of fresh and reused Ga<sub>2</sub>O<sub>3</sub>/MCM-41-0.5

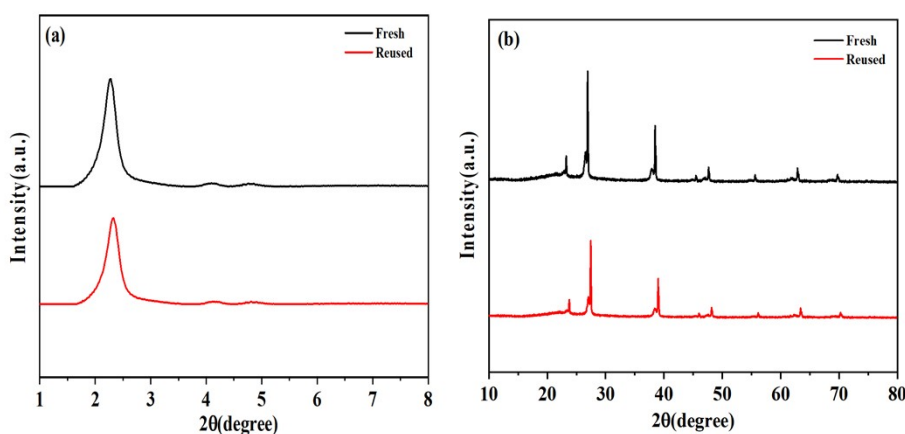

**Fig. S2** (a) Low angle XRD pattern; (b) Wide angle XRD pattern of fresh and reused Ga<sub>2</sub>O<sub>3</sub>/MCM-41-0.5

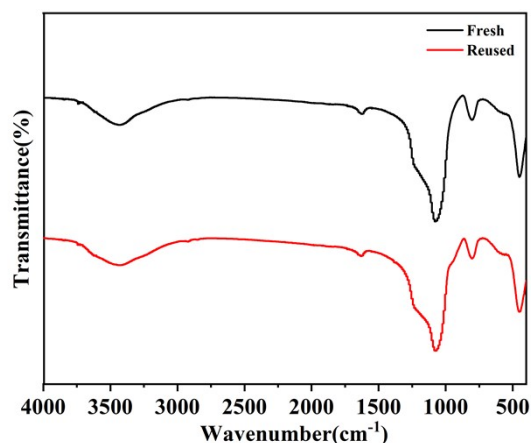

**Fig. S3** FT-IR pattern of fresh and reused Ga<sub>2</sub>O<sub>3</sub>/MCM-41-0.5

**Table S1** Reaction conditions with different catalysts

| Catalysts                              | Co-catalyst | Temperature (°C) | CO <sub>2</sub> pressure (MPa) | Time (h) |
|----------------------------------------|-------------|------------------|--------------------------------|----------|
| Ga-Silicate-1                          | TBAB        | 75               | 0.55                           | 5        |
| ZSM-5                                  | DMF         | 150              | 2                              | 8        |
| Fe-HMS                                 | -           | 120              | 1.6                            | 3        |
| Ti-mSiO <sub>2</sub>                   | -           | 120              | 1.6                            | 6        |
| Zn/SBA-15                              | KI          | 80               | 1                              | 9        |
| I@/Mg-Beta                             | -           | 130              | 1                              | 3        |
| MgO/5Al_SBA-15                         | -           | 125              | 2.5                            | 3        |
| Ga <sub>2</sub> O <sub>3</sub> /MCM-41 | -           | 120              | 3.5                            | 10       |

**Table S2** Reusability of different catalysts

| Catalysts                              | Number of cycles | Conversion (%) | Selectivity (%) |
|----------------------------------------|------------------|----------------|-----------------|
| Fe-HMS                                 | 3                | 97.4           | 92.9            |
| Ti-mSiO <sub>2</sub>                   | 4                | 90             | 95              |
| Zn/SBA-15                              | 1                | 82.5           | 99              |
| I@/Mg-Beta                             | 5                | 85.1           | 100             |
| MgO/5Al_SBA-15                         | 4                | 43             | 95              |
| Ga <sub>2</sub> O <sub>3</sub> /MCM-41 | 5                | 70.2           | 81.5            |
